# Supplementary material for: Dielectric and Electrical Properties of WS2 Nanotubes/Epoxy Composites and Their Use for Stress Monitoring of Structures
Source: Hindawi journal article supplement (doi:10.1155/2017/4838095), 2017-01-01
Supplement: f1 [file 4838095.f1.docx]

**Supplementary Information**

**Dielectric and electrical properties of WS2 nanotubes/epoxy composites and their use for stress monitoring of structures**

A. Sedova1,2, S. Khodorov2, D. Ehre2, B. Achrai2, H.D. Wagner2, R. Tenne2, H. Dodiuk1 and [S. Kenig](http://www.tandfonline.com/author/Kenig%2C+Samuel)1

*1. Shenkar College of Engineering and Design, Ramat Gan 52526, Israel*

*2. Dept. of Materials and Interfaces, Weizmann Institute of Science, Rehovot 76100, Israel*


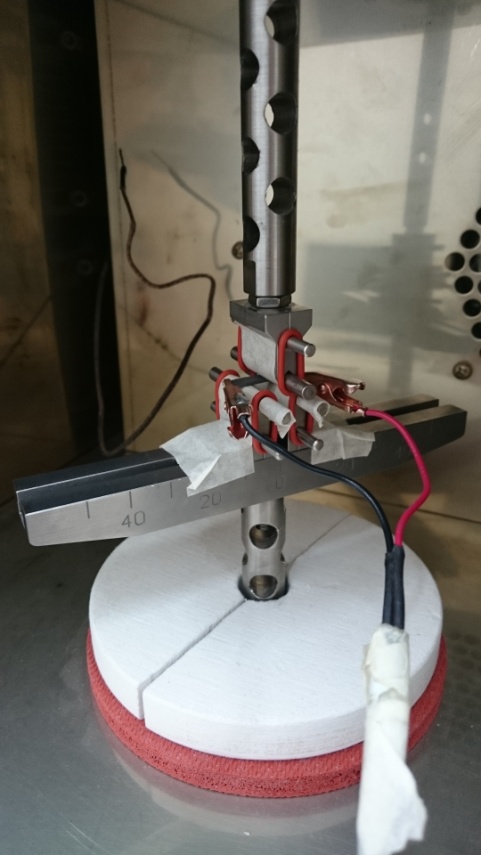


**Figure S1.** Configuration of the three-point bending system.


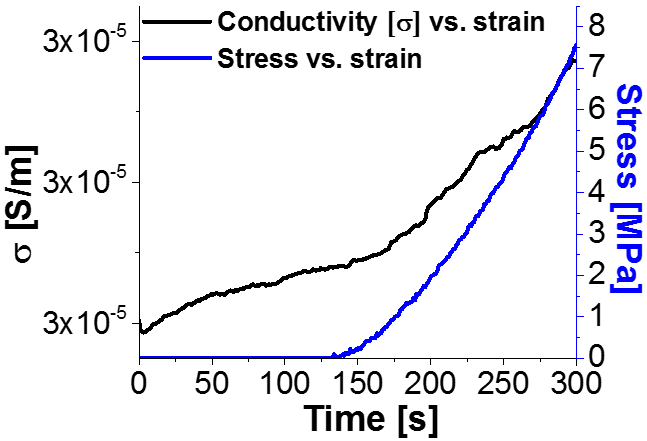


**Figure S2.** Representative plots of the current stabilization time (130 sec) after applying 50 V. The graph shows that the current increases upon increasing stress (after 130 sec) in the three-point bending configuration.


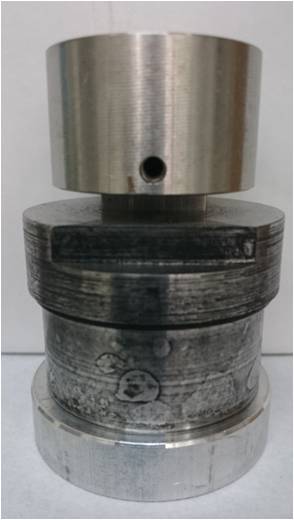


**Figure S3.** Mold assembly for the preparation of samples 8-11.

**
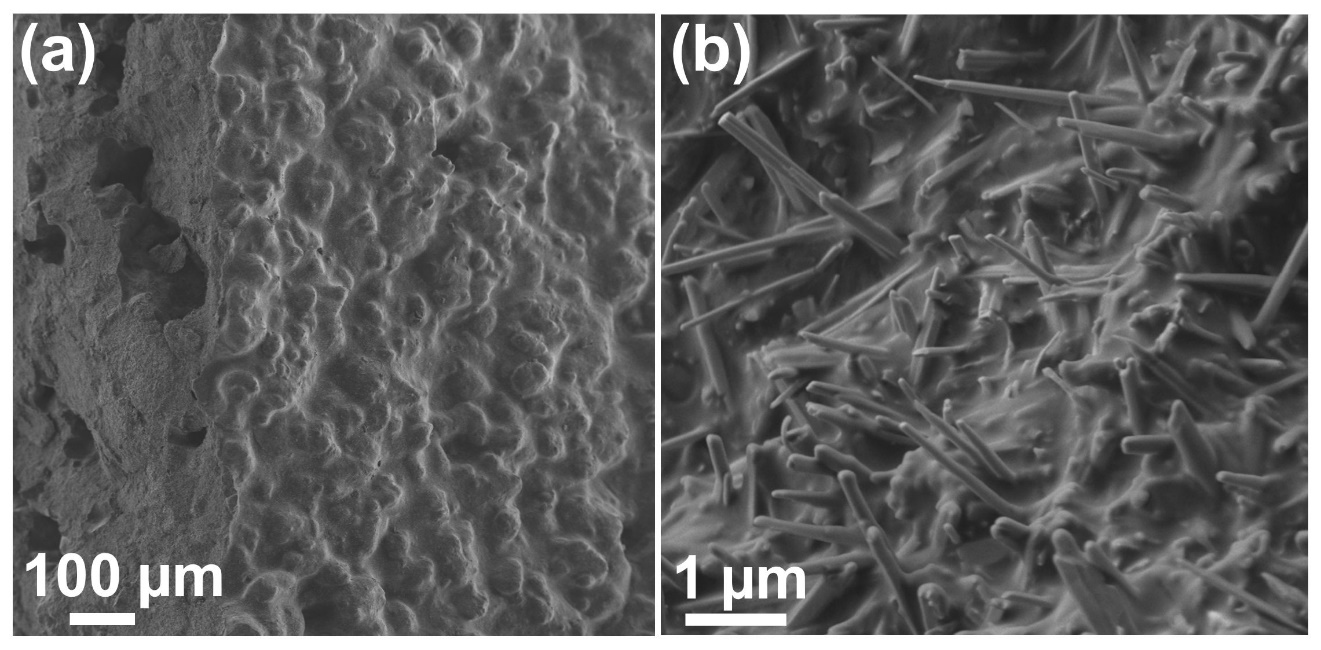
**

**Fig. S4.** SEM images of the (a) surface and (b) fracture of the sample 7.

**
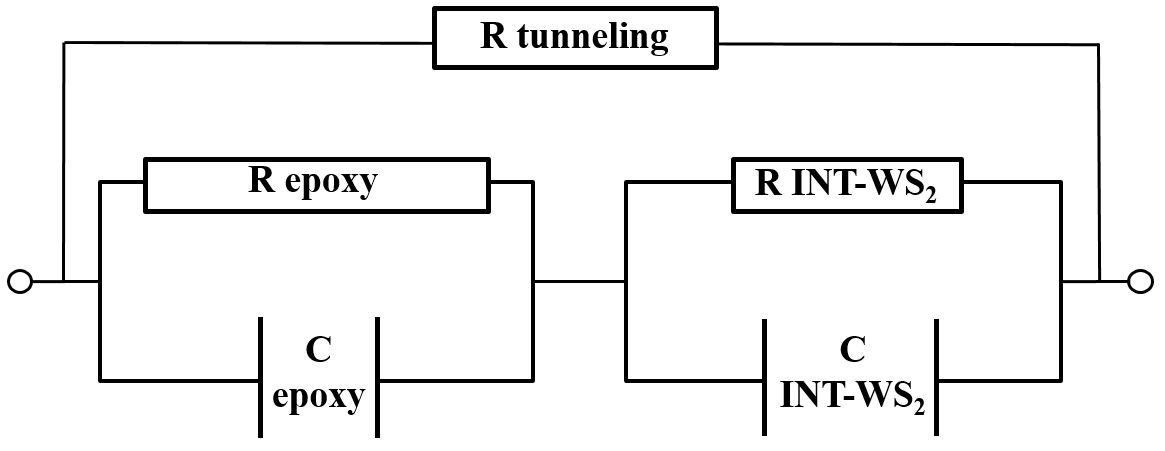
**

**Figure S5.** Proposed schematic description of an equivalent circuit of the epoxy/INT-WS2 composites.


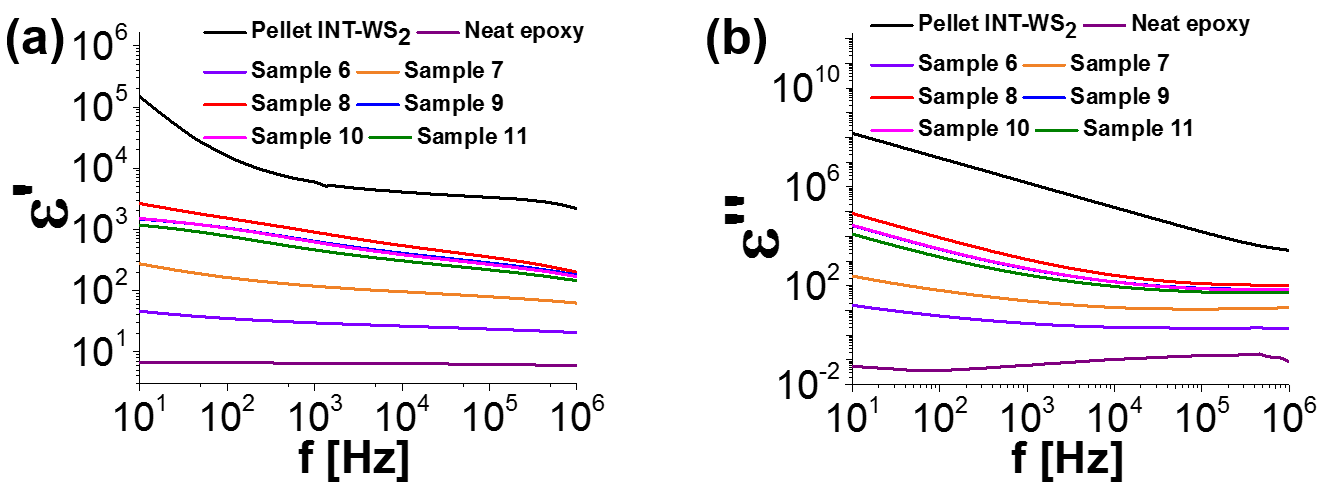


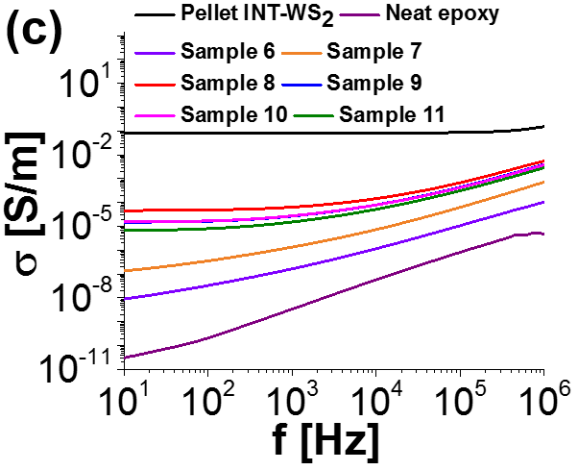


**Figure S6.** (a) Permittivity (dielectric constant- *ε’*) (b) imaginary permittivity (loss factor- *ε”*) (c) conductivity vs. frequency of the INT-WS2 pellet, sample 6, samples 7-11, and the neat epoxy.


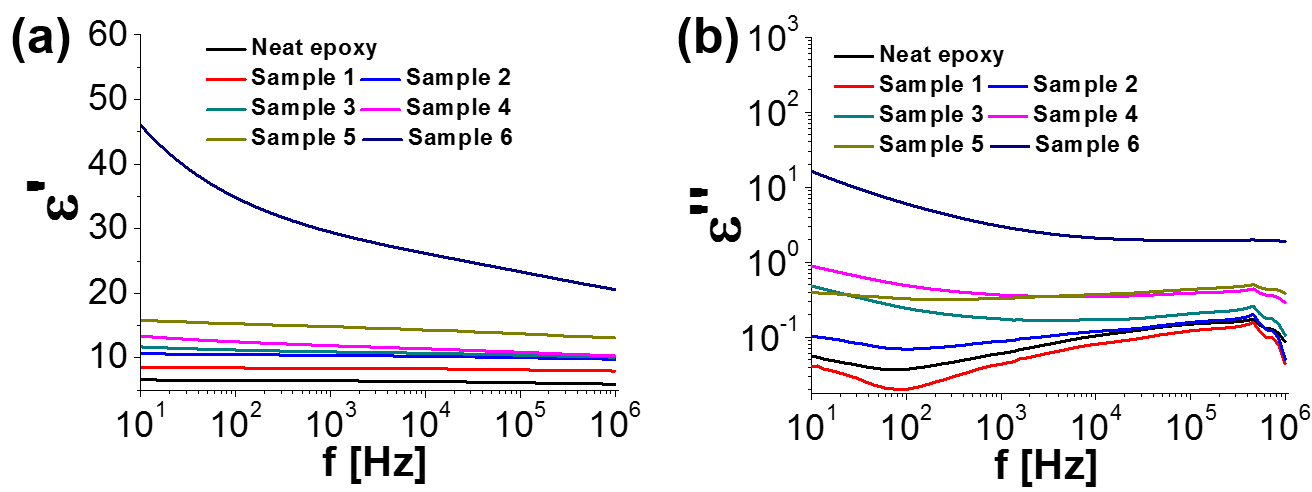


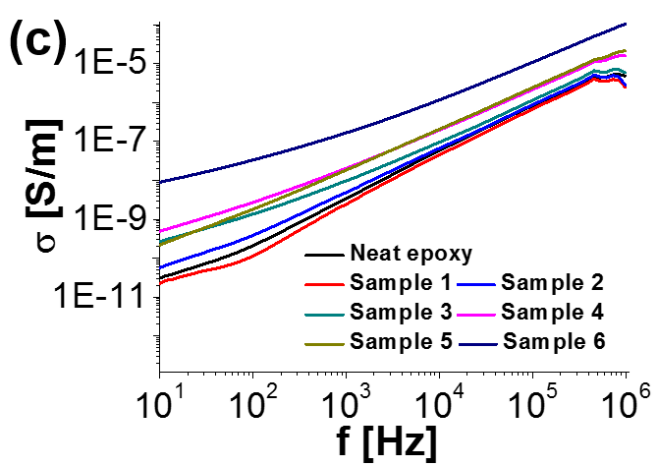


**Figure S7.** (a) Permittivity (dielectric constant- *ε’*) (b) imaginary permittivity (loss factor- *ε”*) (c) conductivity vs. frequency of the samples 1-6 and the neat epoxy.


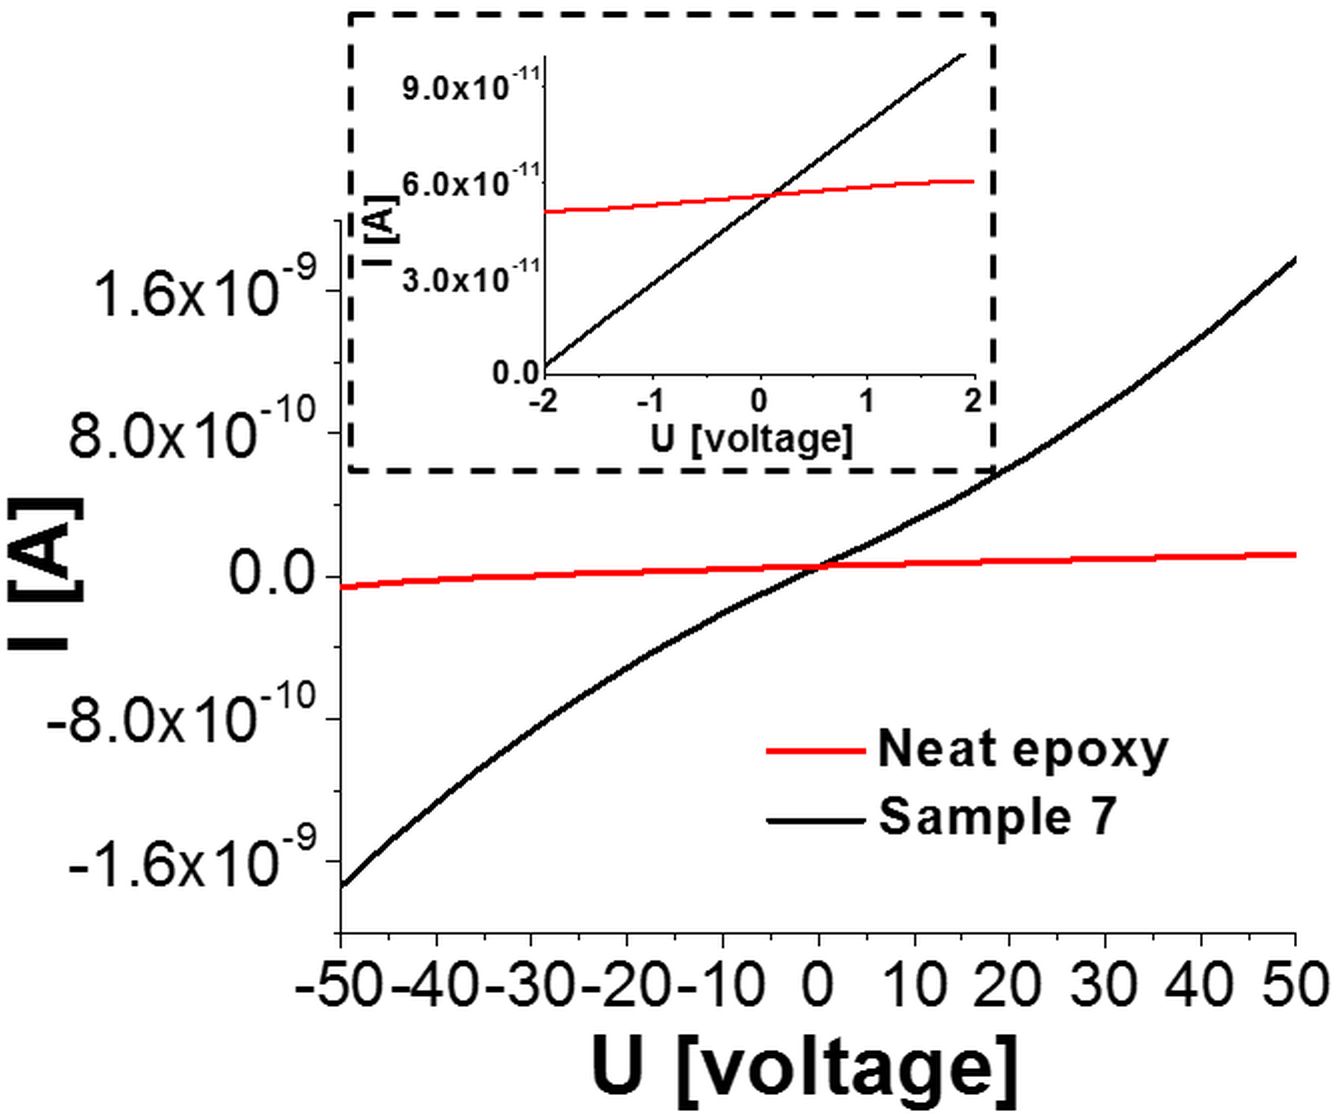


**Figure S8**. *I-U* relationship of the neat epoxy and sample 7.
